# Supplementary material
Source: PubMed Central journal article supplement (PMC7874962)
Supplement: mmc1.pdf [file mmc1.pdf]

**Supplemental Table 1:** Subspecialty categorization using the Clinical Classification Software

| <b>CCSR CATEGORY</b> | <b>CCSR CATEGORY DESCRIPTION</b>                 |
|----------------------|--------------------------------------------------|
| EYE001               | Cornea and external disease                      |
| EYE002               | Cataract and other lens disorders                |
| EYE003               | Glaucoma                                         |
| EYE004               | Uveitis and ocular inflammation                  |
| EYE005               | Retinal and vitreous conditions                  |
| EYE006               | Neuro-ophthalmology                              |
| EYE007               | Strabismus                                       |
| EYE008               | Oculofacial plastics and orbital conditions      |
| EYE009               | Refractive error                                 |
| EYE010               | Blindness and vision defects                     |
| EYE011               | Postprocedural or postoperative eye complication |
| EYE012               | Other specified eye disorders                    |
| EYE013               | OGI/IOFB                                         |

Sources: *Clinical Classifications Software Refined (CCSR) for ICD-10-CM Diagnoses*

Publicly available at: <https://www.hcup-us.ahrq.gov/toolssoftware/ccsr/dxccsr.jsp>
