# Supplementary material
Source: PubMed Central journal article supplement (PMC7874962)
Supplement: mmc2.pdf [file mmc2.pdf]

**Supplemental Table 2:** Most common primary diagnoses for telehealth claims

| <b>Diagnosis</b>                                                                                       | <b>Subspecialty Category<sup>1</sup></b> | <b>Telehealth Volume</b> | <b>Proportion of all Telehealth Visits</b> |
|--------------------------------------------------------------------------------------------------------|------------------------------------------|--------------------------|--------------------------------------------|
| Chalazion                                                                                              | Cornea and external disease              | 188                      | 9.4%                                       |
| <i>Chalazion right upper eyelid</i>                                                                    |                                          | 58                       | 2.9%                                       |
| <i>Chalazion left lower eyelid</i>                                                                     |                                          | 46                       | 2.3%                                       |
| <i>Chalazion left upper eyelid</i>                                                                     |                                          | 42                       | 2.1%                                       |
| <i>Chalazion right lower eyelid</i>                                                                    |                                          | 42                       | 2.1%                                       |
| Dry eye syndrome                                                                                       | Cornea and external disease              | 97                       | 4.8%                                       |
| <i>Dry eye syndrome of bilateral lacrimal glands</i>                                                   |                                          | 89                       | 4.4%                                       |
| <i>Dry eye syndrome of unspecified lacrimal gland</i>                                                  |                                          | 8                        | 0.4%                                       |
| Primary open-angle glaucoma, moderate stage                                                            | Glaucoma                                 | 56                       | 2.8%                                       |
| <i>Primary open-angle glaucoma, bilateral, moderate stage</i>                                          |                                          | 48                       | 2.4%                                       |
| <i>Primary open-angle glaucoma, right eye, moderate stage</i>                                          |                                          | 8                        | 0.4%                                       |
| Exudative age-related macular degeneration, with active choroidal neovascularization                   | Retinal and vitreous conditions          | 45                       | 2.2%                                       |
| <i>Exudative age-related macular degeneration, right eye, with active choroidal neovascularization</i> |                                          | 29                       | 1.4%                                       |
| <i>Exudative age-related macular degeneration, left eye, with active choroidal neovascularization</i>  |                                          | 16                       | 0.8%                                       |
| Conjunctival Hemorrhage                                                                                | Cornea and external disease              | 42                       | 2.1%                                       |
| <i>Conjunctival hemorrhage, right eye</i>                                                              |                                          | 24                       | 1.2%                                       |
| <i>Conjunctival hemorrhage, left eye</i>                                                               |                                          | 18                       | 0.9%                                       |
| Other chronic allergic conjunctivitis                                                                  | Cornea and external disease              | 38                       | 1.9%                                       |
| Unspecified blepharitis                                                                                | Cornea and external disease              | 38                       | 1.9%                                       |
| <i>Unspecified blepharitis right eye, unspecified eyelid</i>                                           |                                          | 20                       | 1.0%                                       |
| <i>Unspecified blepharitis right eye, upper and lower eyelids</i>                                      |                                          | 9                        | 0.4%                                       |
| <i>Unspecified blepharitis right upper eyelid</i>                                                      |                                          | 9                        | 0.4%                                       |
| Preglaucoma, unspecified, bilateral                                                                    | Glaucoma                                 | 27                       | 1.3%                                       |
| Primary open-angle glaucoma, mild stage                                                                | Glaucoma                                 | 27                       | 1.3%                                       |
| Squamous blepharitis                                                                                   | Cornea and external disease              | 27                       | 1.3%                                       |
| <i>Squamous blepharitis right upper eyelid</i>                                                         |                                          | 20                       | 1.0%                                       |
| <i>Squamous blepharitis left upper eyelid</i>                                                          |                                          | 7                        | 0.3%                                       |
