# Supplementary material
Source: PubMed Central journal article supplement (PMC7874962)
Supplement: mmc3.pdf [file mmc3.pdf]

**Supplemental Table 3:** Proportion of telehealth and total claim volume by diagnosis subspecialty categories

| <b>Subspecialty Category<sup>1</sup></b>     | <b>Telehealth Claims</b> | <b>In-Person Claims</b> | <b>Total Claims<sup>2</sup></b> |
|----------------------------------------------|--------------------------|-------------------------|---------------------------------|
| Cornea and External Disease*                 | 681 (48.0%)              | 11,646 (13.2%)          | 12,327 (13.7%)                  |
| Retinal and Vitreous Conditions*             | 238 (16.8%)              | 34,140 (38.6%)          | 34,378 (38.3%)                  |
| Glaucoma*                                    | 190 (13.4%)              | 20,987 (23.8%)          | 21,177 (23.6%)                  |
| Oculofacial Plastics and Orbital Conditions* | 64 (4.5%)                | 873 (1.0%)              | 937 (1.0%)                      |
| Blindness and Vision Defects*                | 62 (4.4%)                | 1,150 (1.3%)            | 1,212 (1.4%)                    |
| Other Specified Eye Disorders*               | 52 (3.7%)                | 1,391 (1.6%)            | 1,443 (1.6%)                    |
| Uveitis and Ocular Inflammation*             | 49 (3.5%)                | 1,091 (1.2%)            | 1,140 (1.3%)                    |
| Cataract and Other Lens Disorders*           | 44 (3.1%)                | 15,007 (17.0%)          | 15,051 (16.8%)                  |
| Strabismus                                   | 31 (2.2%)                | 1,861 (2.1%)            | 1,892 (2.1%)                    |
| Neuro-ophthalmology                          | 9 (0.6%)                 | 216 (0.2%)              | 225 (0.3%)                      |

*\*significant difference between Telehealth and In-Person*

1. Subspecialty categories of *Refractive Error, Postprocedural or Postoperative Eye Complication, and Open Globe Injury / Intraocular Foreign Body* were excluded from the table as our data did not include any claims for these diagnoses.
2. Only the 100 most frequent overall and telehealth diagnosis codes were included. This included 151 unique principal diagnosis codes.
